# Supplementary material
Source: Preprints.org preprint supplement (doi:10.20944/preprints202007.0229.v1)

# Preservation Median rank

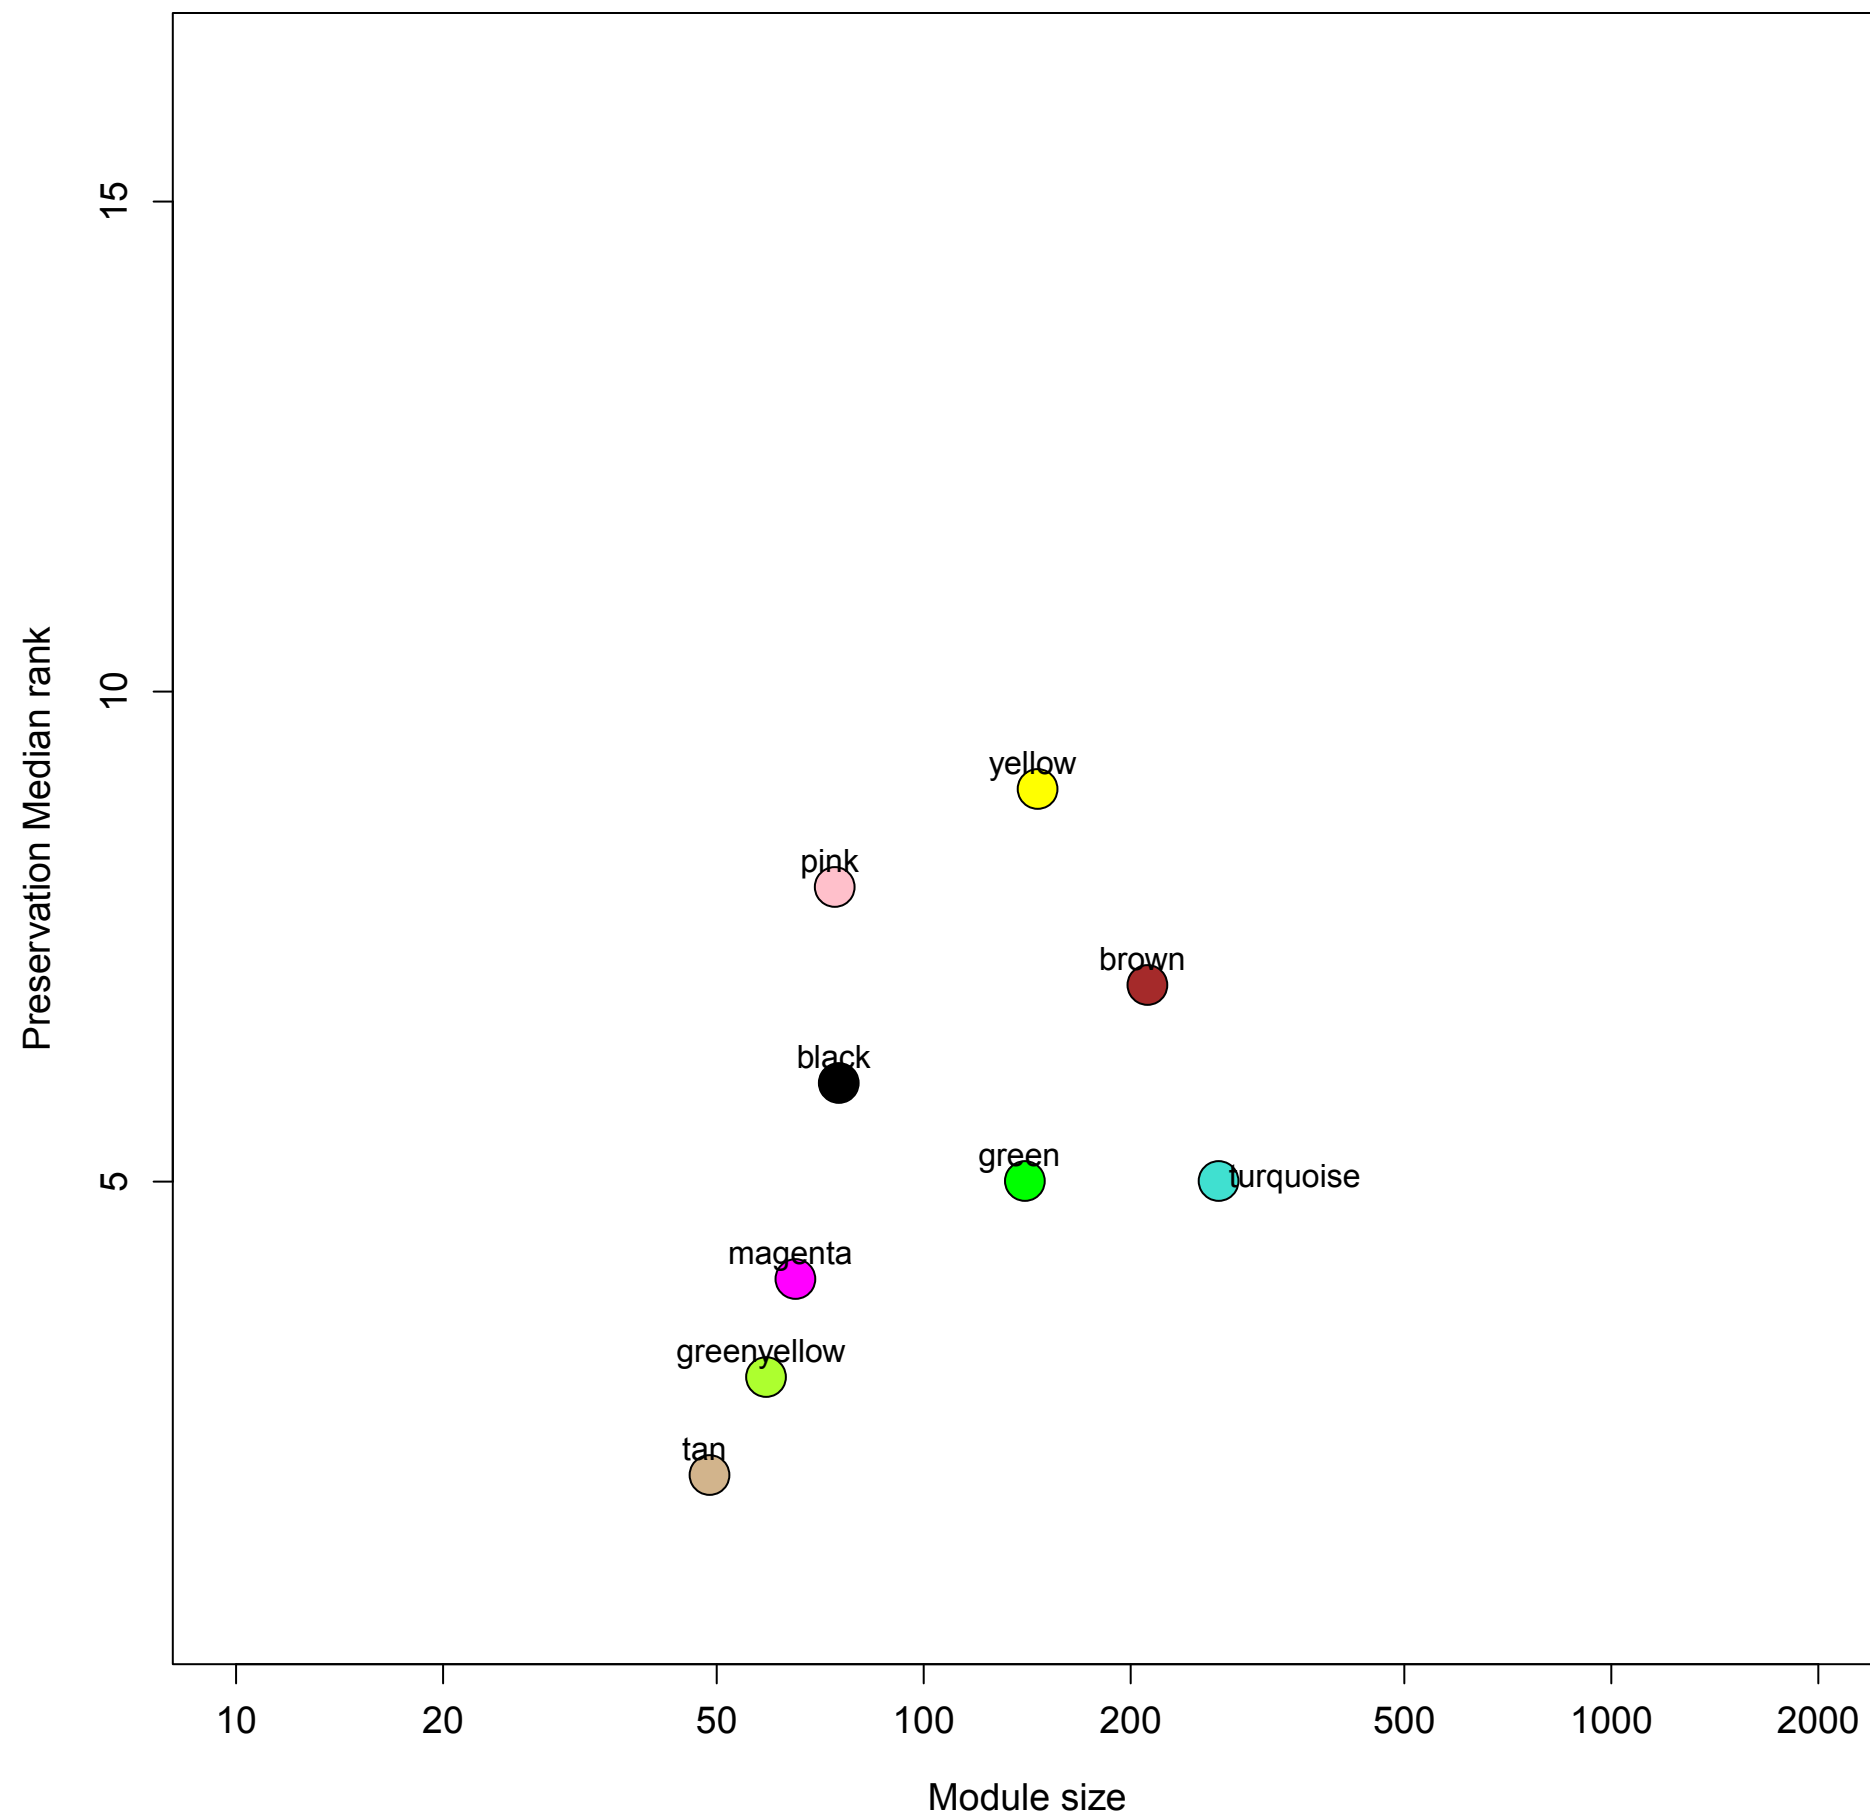

# Preservation Zsummary

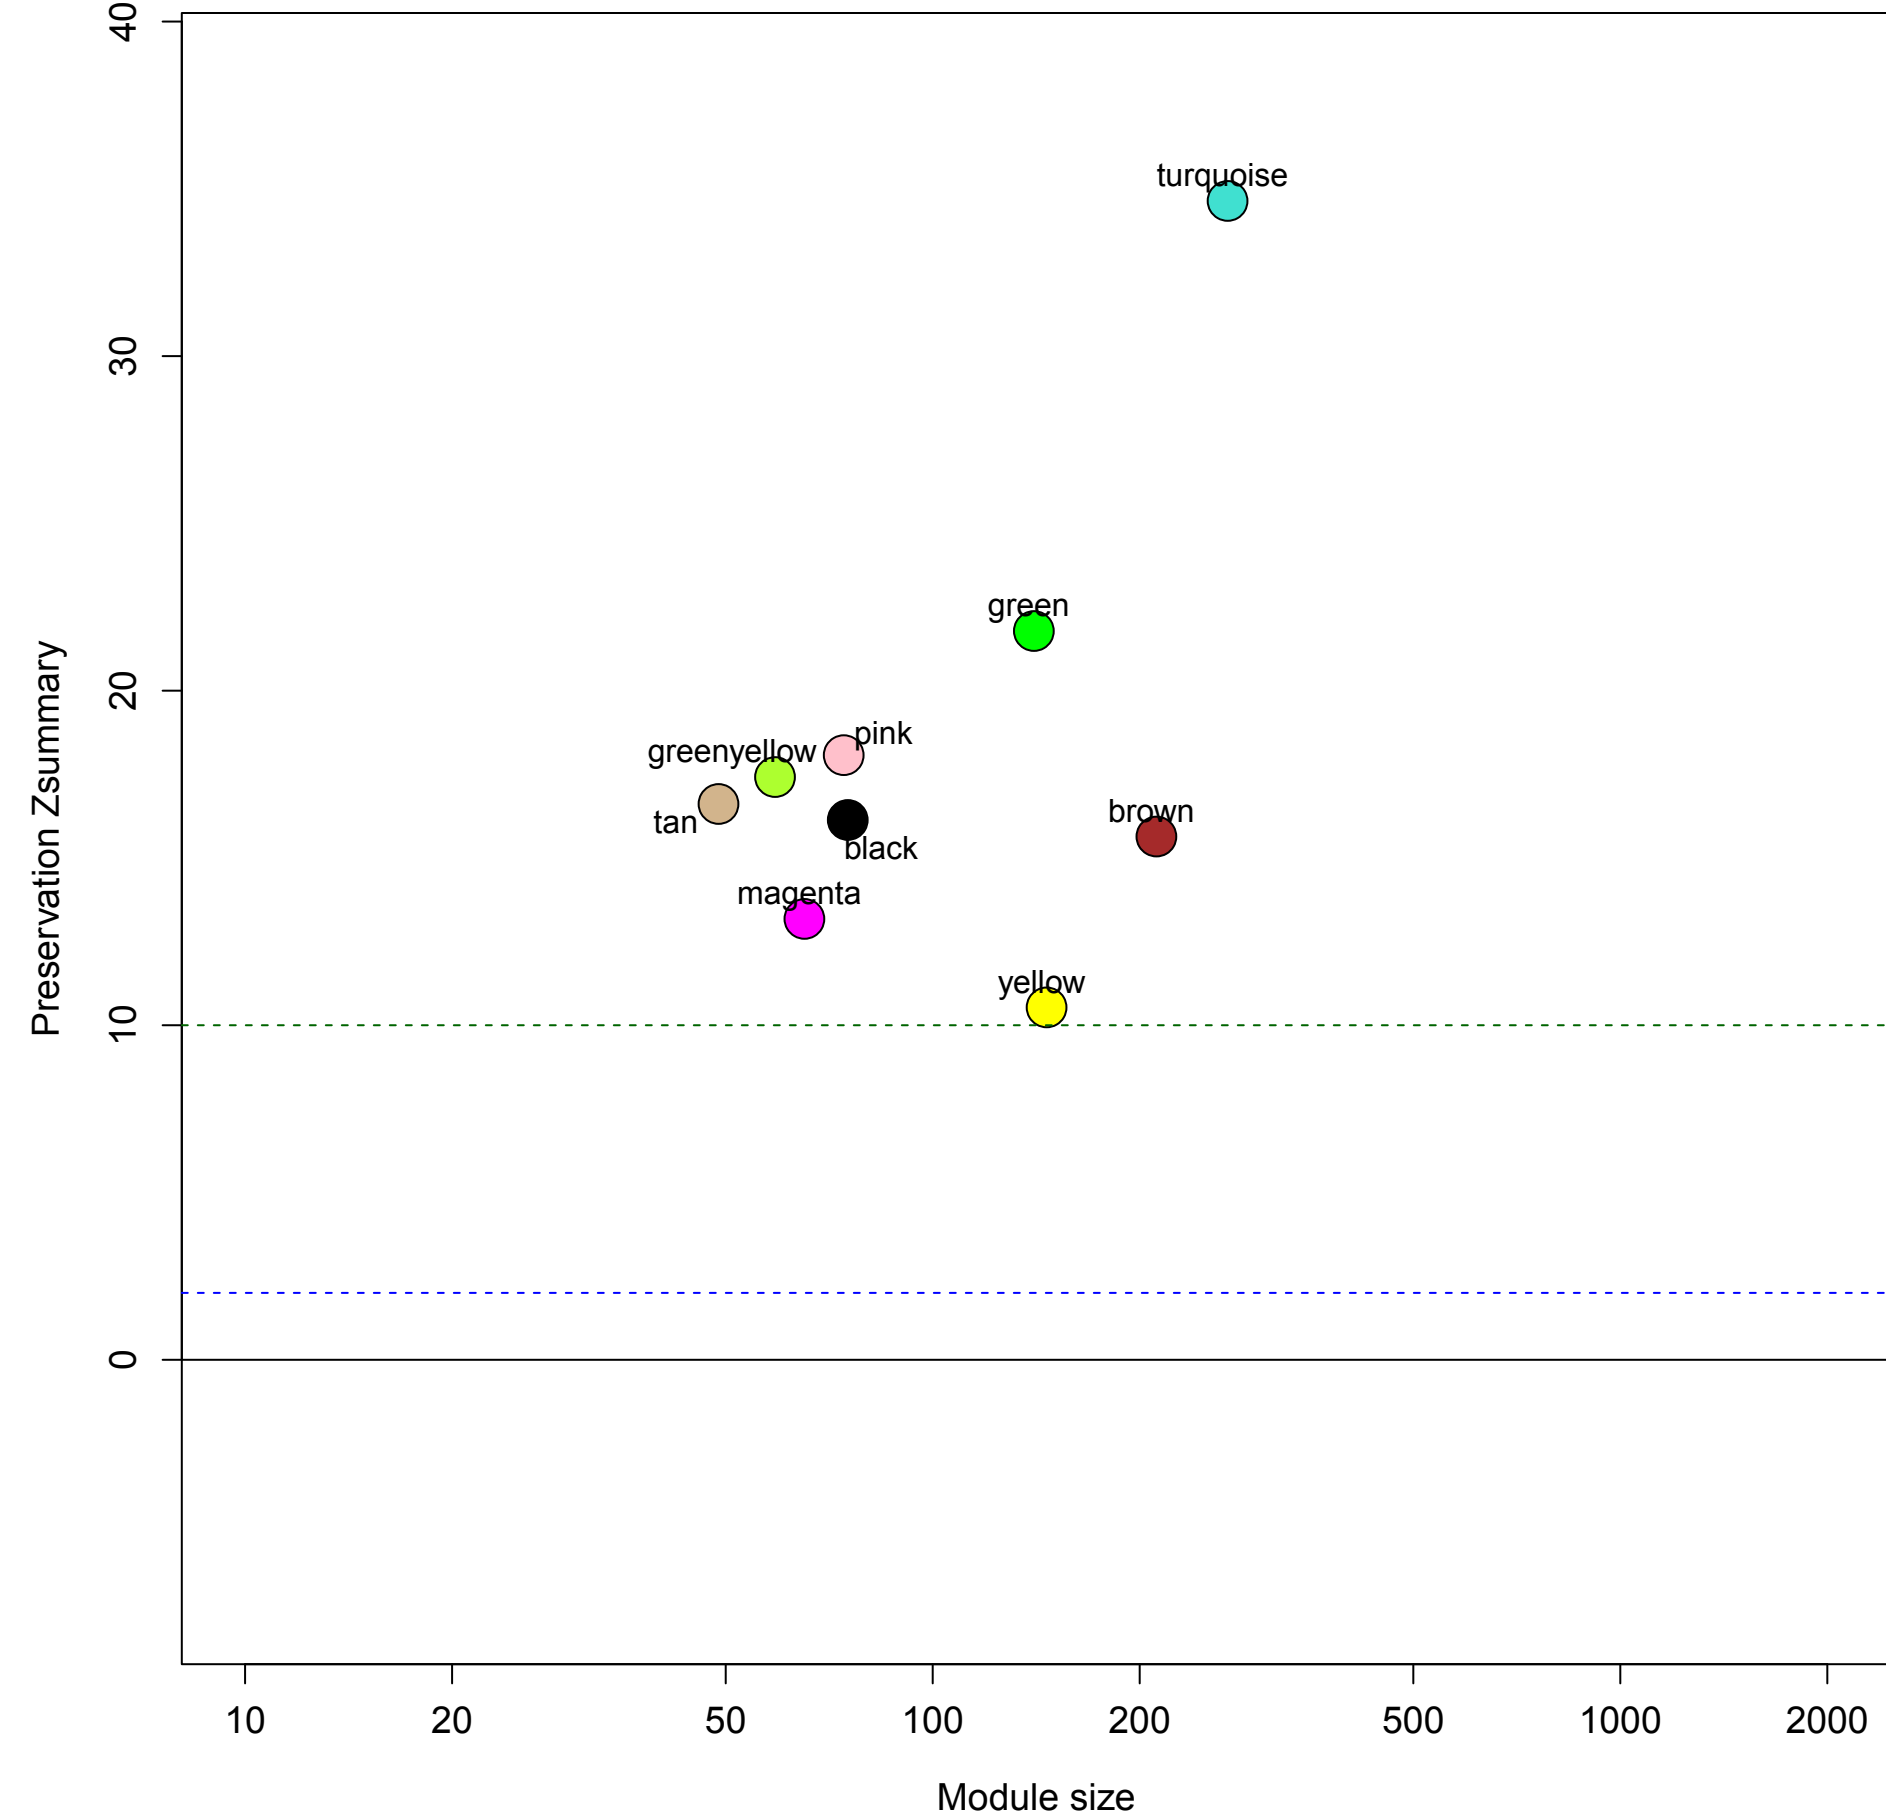

Supplement: Supplementary file 1 [file supplementary]
